# Supplementary material for: Revisiting the mechanism of redox-polymerization to build the hydrogel with excellent properties using a novel initiator
Source: Royal Society of Chemistry journal article supplement (doi:10.1039/c5sm02910d), 2016-01-01
Supplement: c5sm02910d1.pdf [file c5sm02910d1.pdf]

## Supporting Information

### **Revisiting the mechanism of redox-polymerization to build the hydrogel with excellent properties using a novel initiator**

Sai Zhang †, Zixing Shi †\*, Hongjie Xu†, Xiaodong Ma†, Jie Yin †, and Ming Tian ‡\*

† School of Chemistry & Chemical Engineering, State Key Laboratory of Metal Matrix Composite

Materials, Shanghai Jiao Tong University, 800 Dongchuan Road, Shanghai, 200240, China

Phone number: +86 21 54743268

Fax number: +86 21 54747445

Email: zxshi@sjtu.edu.cn

‡ State Key Lab of Organic–Inorganic Composites, Beijing University of Chemical Technology, Beijing  
100029, China

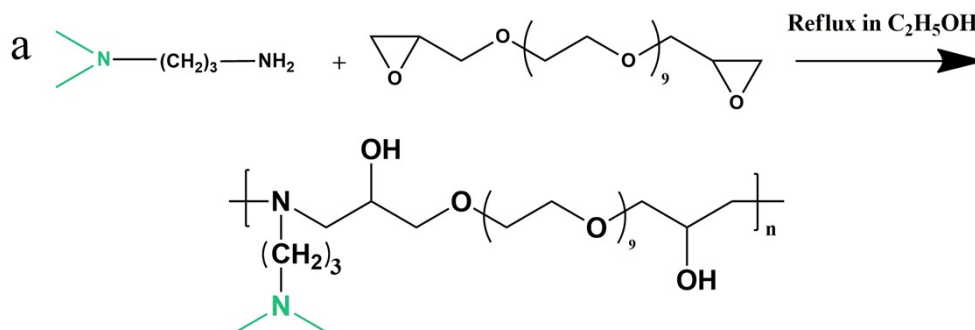

**Figure S1.** The process for synthesis of PEA. The weight averaged molecular weight  $M_w$  and the polydispersity index  $M_w/M_n$  were measured by GPC in the mobile phase of tetrahydrofuran (THF). The results showed that  $M_w$  was about  $1.2 \times 10^4$  g/mol and  $M_w/M_n$  was about 1.5. Yield of PEA was nearly 98%.

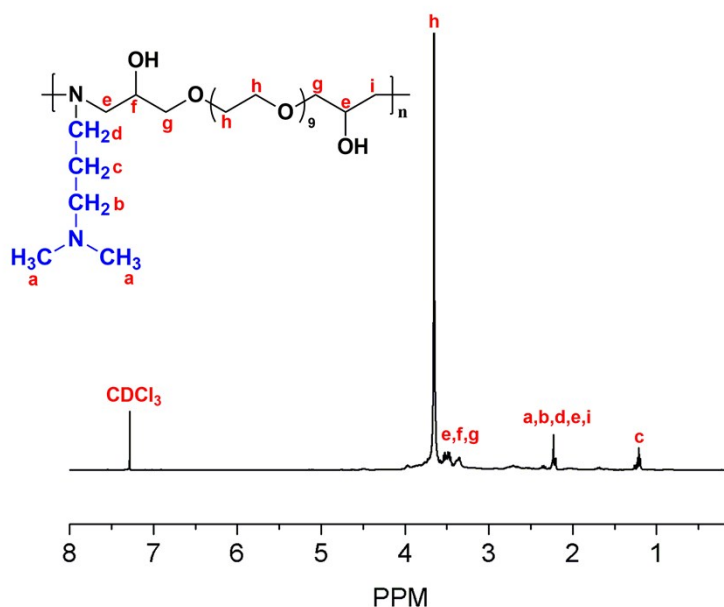

**Figure S2.**  $^1H$  NMR spectrum of synthesized PEA in  $CDCl_3$ . The peaks (a-i) in  $^1H$  NMR spectrum of PEA can be assigned to the related proton. Because of the high reactivity between primary amino groups and epoxy groups, almost all epoxy groups were ring-opened by DMPA according to the integral of  $^1H$  NMR spectra.

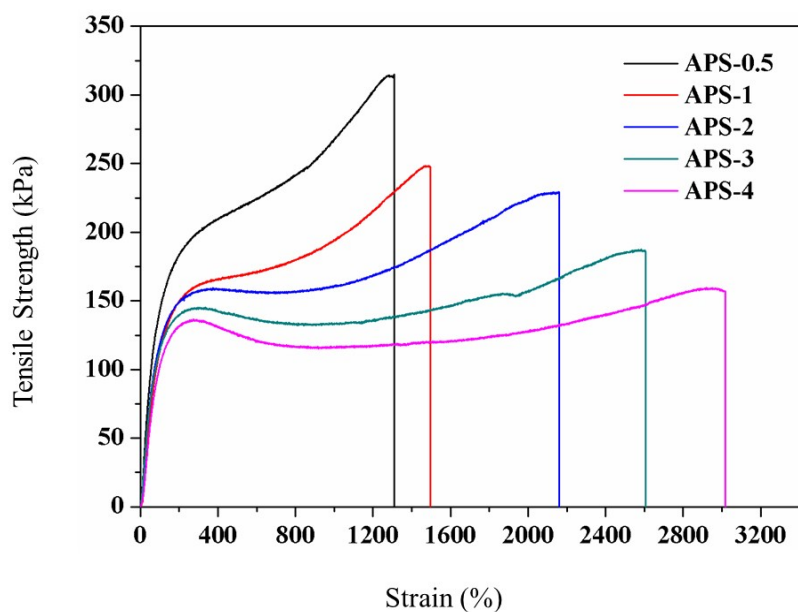

**Figure S3.** Effect of APS content for the mechanical properties of PEA-PAM hydrogels. The PEA content was fixed at 0.3wt% relatively to AAm monomer (5g). The water content was 70%. And the ratio of APS/PEA was changed from 0.5-4. The letter n of APS-n represents the related ratio of APS/PEA.

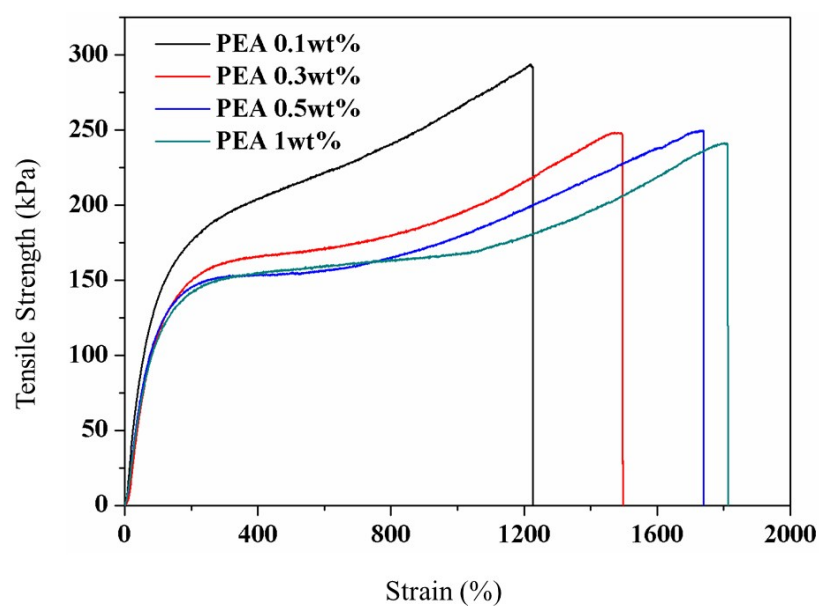

**Figure S4.** Effect of PEA content for the mechanical properties of PEA-PAM hydrogels. The amount of APS was fixed at 0.0057g. The PEA content was changed from 0.1wt%-1wt% relatively to AAm monomer (5g). The water content was 70%. The letter m of PEA-mwt% represents the weight ratio of PEA.

**Table S1.** Tensile modulus and elongation at break of the as-prepared APX-n and PEA-m sample.

|                | APS-n <sup>a</sup> |       |       |       |       | PEA-m <sup>b</sup> |         |         |       |
|----------------|--------------------|-------|-------|-------|-------|--------------------|---------|---------|-------|
|                | APS-0.5            | APS-1 | APS-2 | APS-3 | APS-4 | PEA-0.1            | PEA-0.3 | PEA-0.5 | PEA-1 |
| Modulus (MPa)  | 0.827              | 0.730 | 0.717 | 0.677 | 0.634 | 0.793              | 0.730   | 0.652   | 0.651 |
| Elongation (%) | 1296%              | 1510% | 2186% | 2617% | 3020% | 1218%              | 1510%   | 1746%   | 1759% |

<sup>a</sup>The letter n of APS-n represents the related ratio of APS/PEA.

<sup>b</sup>The letter m of PEA-mwt% represents the weight ratio of PEA.

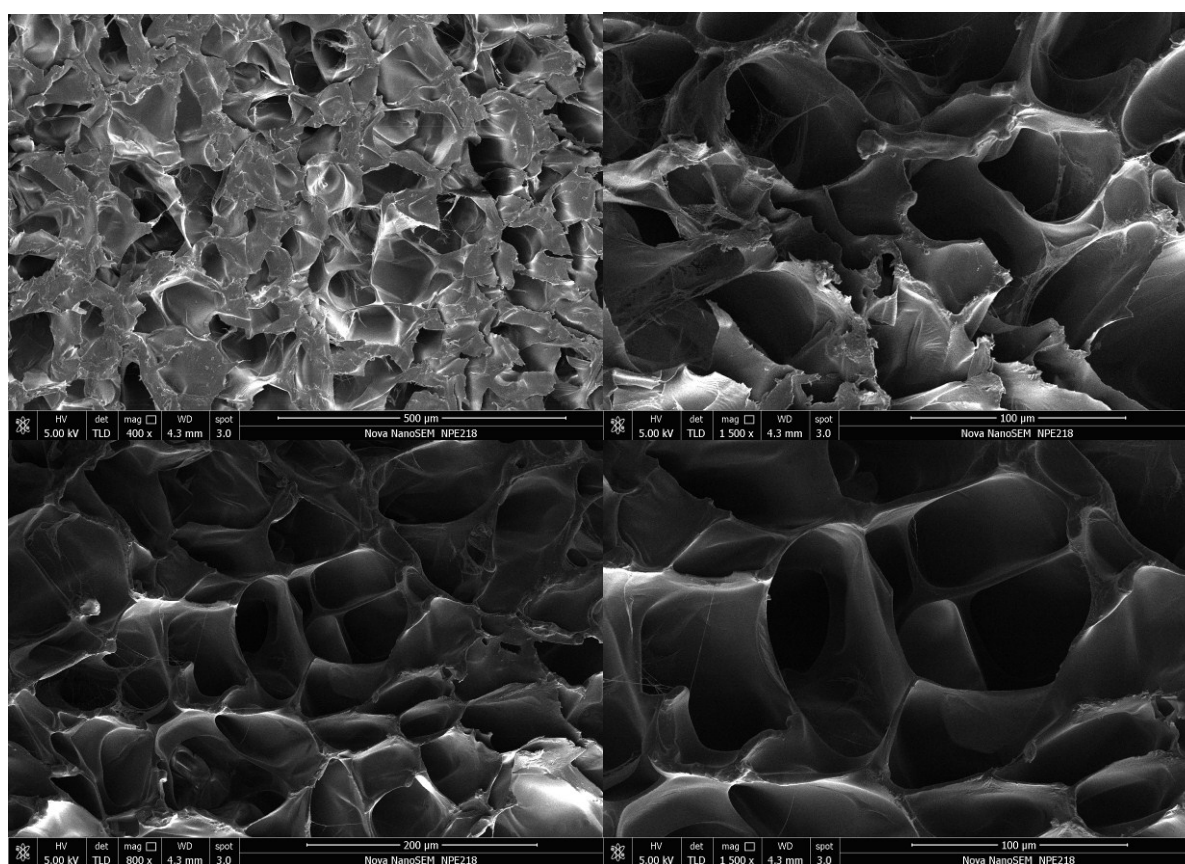

**Figure S5.** Representative SEM images of PEA-0.3wt%.
